# Supplementary material
Source: Elsevier journal article supplement (https://www.sciencedirect.com/science/article/pii/S1698031X20300716)
Supplement: mmc1 [file S1698031X20300716:mmc1.pdf]

# Spina Bifida Questionary

\* Required

1. Which country do you work? \*

Your answer

2. How old are you? \*

Your answer

3. What is your basic surgery formation? \*

- ☐ Pediatric surgeon
- ☐ Urologist

4. How much, approximately, do you dedicate to Pediatric Urology? \*

- ☐ < 25% of your dedication is to pediatric urology
- ☐ 25-50% of your dedication is to pediatric urology
- ☐ 50-75% of your dedication is to pediatric urology
- ☐ >75% of your dedication is to pediatric urology
- ☐ 100% of your dedication is to pediatric urology

5. Do you practice Transitional Urology? \*

Consider transitional urology as having patients > 18 years old with congenital urological condition that affects his/her life into adulthood (ie. neurogenic bladder, posterior urethral valve, bladder exstrophy..)

- ☐ Yes
- ☐ No

6. How long have you been dedicated to pediatric urology? \*

- ☐ < 5 years
- ☐ 5 - 10 years
- ☐ 10 - 15 years
- ☐ 15 - 20 years
- ☐ > 20 years

7. Which kind of hospital do you work in? \*

Consider academic hospital = university or educational public hospital

- ☐ Academic hospital only
- ☐ Private hospital only
- ☐ Academic and private hospital

8. Do you work with patients who have spina bifida (dysraphism, meningocele ...)? \*

- ☐ Yes
- ☐ No

9. Do you ask to your patients with spina bifida about their Quality of Life (QOL)? \*

\*

Approaching QOL means that you discuss physical and material wellbeing, social capacity, emotional welfare and activity development with the patient or his family

- ☐ Yes
- ☐ No
- ☐ I do not work with spina bifida

10. Do you talk about sexuality with your patients with spina bifida? \*

Approaching sexuality means that you discuss about sex, contraceptive methods or fertility with the patient or his family

- ☐ Yes
- ☐ No
- ☐ I don't work with spina bifida

11. Do you consider relevant to talk about quality of life with your patients who have spina bifida? \*

- ☐ Yes
- ☐ No
- ☐ I do not work with spina bifida

12. Do you consider relevant to talk about sexuality with your patients who have spina bifida? \*

- ☐ Yes
- ☐ No
- ☐ I do not work with spina bifida
